# Supplementary material
Source: PubMed Central journal article supplement (PMC4340804)
Supplement: Supp_Data.pdf [file Supp_Data.pdf]

## Supplementary Data

### Supplementary Methods

#### Preparation of tissue lysates for determination of hepatic lipid content

Liver lysates were prepared by homogenization of 50 mg of frozen liver in 400  $\mu$ L 0.9% NaCl and addition of 1000  $\mu$ L of hexane/isopropanol (3:2 vol/vol, HIp). Samples were incubated for 45 min in the dark at room temperature and centrifuged for 15 min (4000 $\times$ g, 15°C). The upper organic phase was collected, and lysates were again treated with 800  $\mu$ L of HIp as indicated above. The two organic elution samples were pooled, evaporated using a SpeedVac (RC 10-10, Jouan, Fisher Scientific, Schwerte, Germany), and resuspended in 200  $\mu$ L of HIp. For the analysis, 10  $\mu$ L of the final sample was evaporated, resuspended in 5  $\mu$ L of Triton (5%)/phosphate-buffered saline (PBS), and mixed with 500  $\mu$ L of the kit reagent, as indicated in the manufacturer's instruction.

#### Preparation of tissue lysates for hepatic protein expression (western blot)

One hundred milligrams of fresh liver tissue was homogenized in 500  $\mu$ L of homogenization buffer (pH 7.9)

containing proteinase (PIC; 1:100, Sigma Aldrich, Steinheim, Germany) and phosphatase inhibitors (PhosSTOP; 1:10, Roche Diagnostics, Mannheim, Germany) for 2 min (Micra D-1 homogenizer, ART, Müllheim, Germany) and incubated for 30 min on ice. Afterward, homogenates were centrifuged (4000 $\times$ g, 1 min, 4°C), and the supernatant (cytosolic fraction) was stored at -80°C until further analysis. For whole-cell lysates, 30 mg of frozen hepatic tissue was homogenized in 400  $\mu$ L of RIPA buffer (pH 7.2) containing proteinase and phosphatase inhibitors for 2 $\times$ 2 min at 25 Hz using the TissueLyser II (Qiagen, Hilden, Germany). Homogenates were incubated on ice for 30 min, and supernatant after centrifugation (12,000 $\times$ g, 30 min, and 4°C) was stored at -80°C until further analysis. The protein concentration of the lysates was quantified using the Pierce<sup>TM</sup> BCA Protein Assay (Thermo Scientific, Waltham, MA).

SUPPLEMENTARY TABLE S1. PRIMER SEQUENCES USED FOR QRT-PCR ANALYSES IN LIVER RNA

| <i>Gene symbol</i> | <i>Gene name</i>                               | <i>Forward 5'-3'</i>  | <i>Reverse 3'-5'</i>  |
|--------------------|------------------------------------------------|-----------------------|-----------------------|
| <i>Cat</i>         | Catalase                                       | GGAGCAGGTGCTTTTGGATA  | CTGACTCTCCAGCGACTGTG  |
| <i>Eef2</i>        | Eukaryotic translation elongation factor 2     | GCGTGCCAAGAAAGTAGAGG  | AAGATGGGGTCCAGGATGAG  |
| <i>Fads1</i>       | Fatty acid desaturase 1                        | CATGCCATACAACCATCAGC  | CATCCAGGCCAAGTCCAC    |
| <i>Fasn</i>        | Fatty acid synthase                            | GATGGAAGGCTGGGCTCTAT  | TGCCTCTGAACCACTCACAC  |
| <i>Gclc</i>        | Glutamate-cysteine ligase, catalytic subunit   | GTGGAGGCCAATATGAGGAA  | GGGTGCTTGTTTATGGCTTC  |
| <i>Gclm</i>        | Glutamate-cysteine ligase, modifier subunit    | TCCCATGCAGTGGAGAAGAT  | AGCTGTGCAACTCCAAGGAC  |
| <i>Gpx1</i>        | Glutathione peroxidase 1                       | CGGGACTACACCGAGATGAA  | ACCAGGTCCGACGTACTTGA  |
| <i>Gpx4</i>        | Glutathione peroxidase 4                       | ATGAAAGTCCAGCCCAAGG   | CGGCAGGTCCTTCTCTATCA  |
| <i>G6pc</i>        | Glucose-6-phosphatase, catalytic subunit       | TCGGAGACTGGTTCAACCTC  | TCACAGGTGACAGGGAAGT   |
| <i>Hspa1b</i>      | Heat shock protein 1B                          | TGCACTTGATAGCTGCTTGG  | CAGTGCTGCTCCCAACATTA  |
| <i>Hspa5</i>       | Heat shock protein 5                           | GGCGTATTTGGGAAAGAAGG  | CAGTGCTGTAGGCTCATTG   |
| <i>Hspa8</i>       | Heat shock protein 8                           | CTCGGAAAGACCGTTACCAA  | CACATCAAAAGTGCCACCTC  |
| <i>Nqo1</i>        | NAD(P)H dehydrogenase, quinone 1               | TTCTCTGGCCGATTACAGAGT | TCCAGACGTTTTCTTCCATCC |
| <i>Pck1</i>        | Phosphoenolpyruvate carboxykinase 1, cytosolic | AGCCTTTGGTCAACAACCTGG | TGCCTTCGGGGTTAGTTATG  |
| <i>Pdia3</i>       | Protein disulfide isomerase associated 3       | AGCCAATGATGTGCCTTCTC  | ATTCACGGCCACCTTCATAC  |
| <i>Scd1</i>        | Stearoyl-coenzyme A desaturase 1               | CCTGCGGATCTTCCTTATCA  | CAGTTTTCCGCC CTCTCTTT |
| <i>Sod1</i>        | Superoxide dismutase 1, soluble                | GGGTTCACGTCATCAGTA    | CAGGTCTCCAACATGCCTCT  |
| <i>Rn18S</i>       | 18S ribosomal RNA                              | GGTAACCCGTTGAACCCCAT  | CAACGCAAGCTTATGACCCG  |

SUPPLEMENTARY TABLE S2. COMPOSITION  
OF BUFFERS USED FOR WESTERN BLOT  
AND PROTEASOME ACTIVITY ANALYSES

| <i>Analyses</i>     | <i>Buffer</i>         | <i>Ingredients</i>                                                                                                                                 |
|---------------------|-----------------------|----------------------------------------------------------------------------------------------------------------------------------------------------|
| Western blot        | Homogenization buffer | 1.5 mM MgCl <sub>2</sub><br>10 mM KCl<br>0.5 mM dithiothreitol<br>10 mM Hepes<br>0.1% Nonidet P-40                                                 |
|                     | RIPA buffer           | 0.5 M Tris-HCl<br>1.5 M NaCl<br>5% Sodium deoxycholate<br>1% Sodium dodecyl sulfate<br>10% Nonidet P-40<br>2 mM EDTA                               |
|                     | Loading buffer        | 0.5 M Tris-HCl<br>8 % Glycerol<br>1.6% Sodium dodecyl sulfate<br>0.001% Bromophenol blue<br>5% β-Mercapto ethanol                                  |
| Proteasome activity | Lysis buffer          | 20 mM Tris-HCl<br>10% Glycerol<br>0.5 mM EDTA<br>0.5% Nonidet P-40<br>5 mM MgCl <sub>2</sub><br>1 mM Dithiothreitol<br>1 mM Adenosine triphosphate |
|                     | Reaction buffer       | 20 mM Tris-HCl<br>5 mM MgCl <sub>2</sub><br>1 mM Dithiothreitol<br>1 mM Adenosine triphosphate                                                     |

SUPPLEMENTARY TABLE S3. PRIMARY ANTIBODIES USED IN THE WESTERN BLOT ANALYSES OF LIVER LYSATES

| <i>Name</i>                    | <i>Manufacturer information</i>    | <i>Dilution</i> |
|--------------------------------|------------------------------------|-----------------|
| Akt (pan) (C67E7)              | Cat. no. 4691, Cell Signaling      | 1:1000          |
| Phospho-Akt (Ser473) XP®       | Cat. no. 4060, Cell Signaling      | 1:2000          |
| AMPK                           | sc-25792, Santa Cruz Biotechnology | 1:100           |
| Phospho-AMPK (Thr172)          | Cat. no. 2535, Cell Signaling      | 1:1000          |
| BiP/Grp78                      | Cat. no. 3183, Cell Signaling      | 1:1000          |
| Lamp2a                         | ab18528, Abcam                     | 1:1000          |
| LC3                            | NB100-2220, Novus Biologicals      | 1:400           |
| mTOR                           | Cat. no. 2972, Cell Signaling      | 1:1000          |
| Phospho-mTOR (Ser2448) XP®     | Cat. no. 5536, Cell Signaling      | 1:1000          |
| p70 S6 Kinase                  | Cat. no. 2708, Cell Signaling      | 1:1000          |
| Phospho-p70 S6 Kinase (Thr389) | Cat. no. 9234, Cell Signaling      | 1:500           |
| Mup                            | sc-21856, Santa Cruz Biotechnology | 1:500           |
